# Supplementary material
Source: Springer Nature journal article supplement (https://www.springermedizin.de/resource/supplementary/12936_2009_1243_MOESM4_ESM.pdf/9549312)

Zinc status

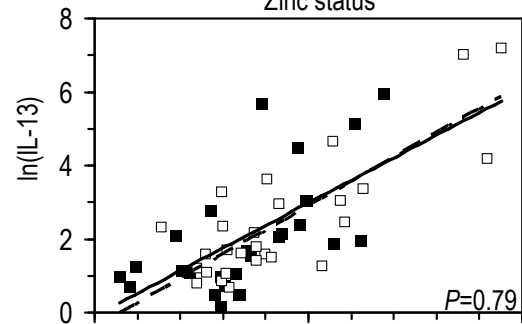

Magnesium status

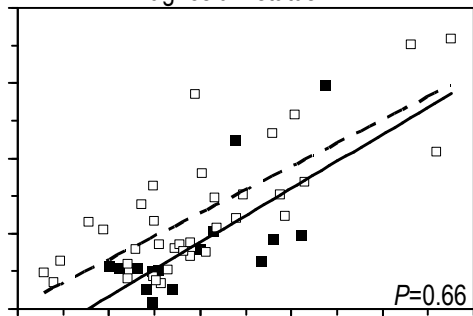

Iron deficiency anaemia status

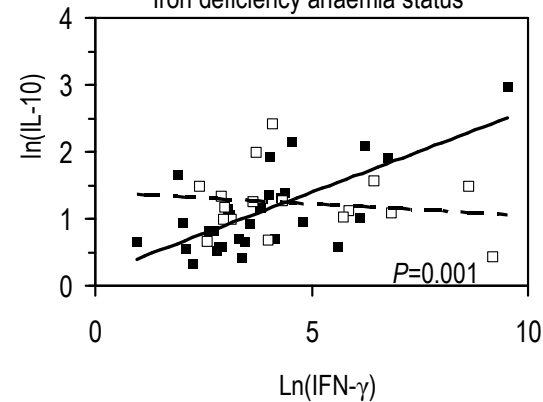

Malaria status

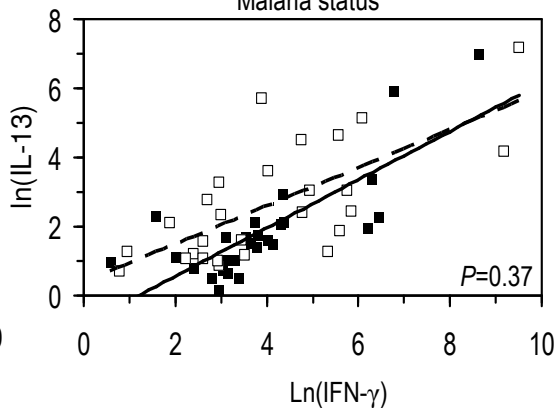

Supplement: MOESM4 [file 9549312]
